# Supplementary material for: The Relation between Vitamin D Level and Lung Clearance Index in Cystic Fibrosis—A Pilot Study
Source: MDPI journal article supplement (doi:10.3390/children9030329), 2022-03-01
Supplement: s1 [file s1]

Supplementary Materials

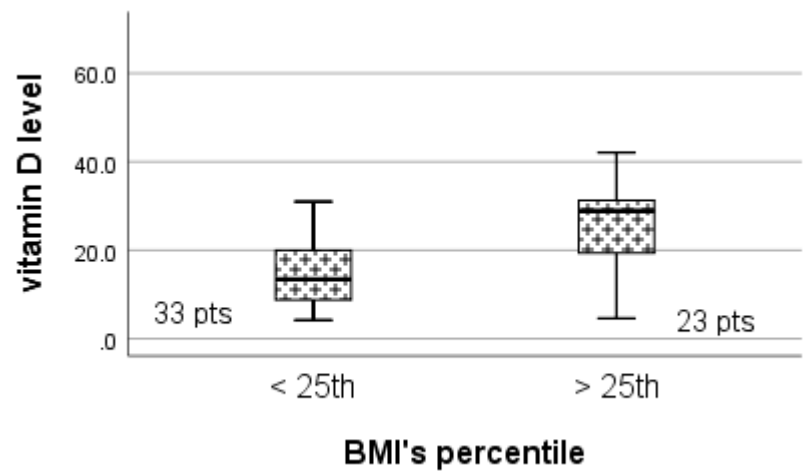

Figure S1. Vitamin D level according to BMI percentile.

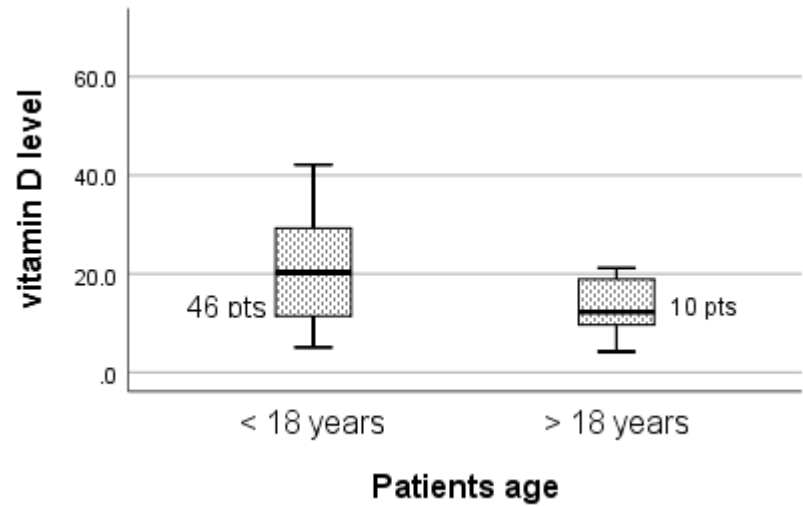

Figure S2. Vitamin D level according to patients age.

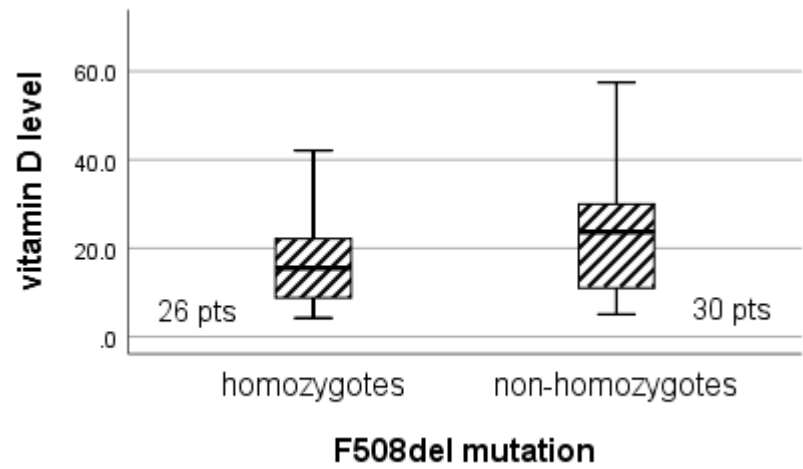

Figure S3. Vitamin D level according to F508del mutation.

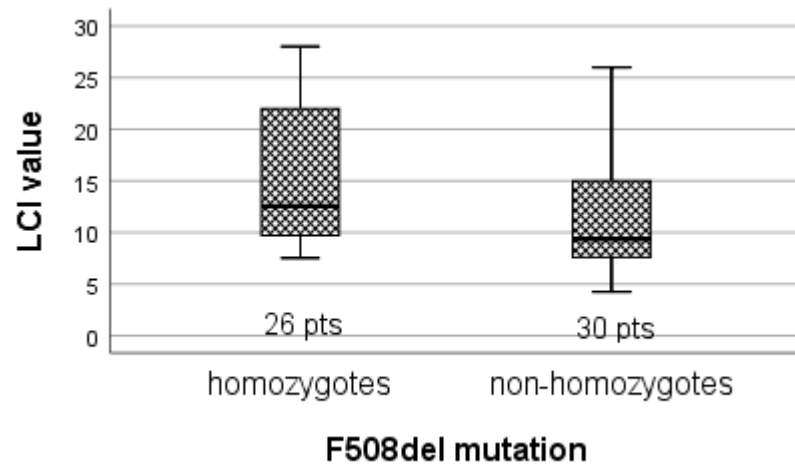

Figure S4. LCI value according to F508del mutation.

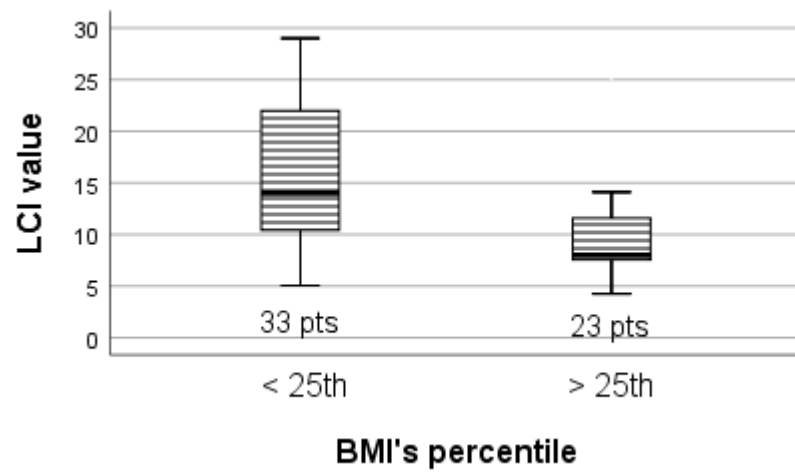

Figure S5. LCI value according to BMI percentile.

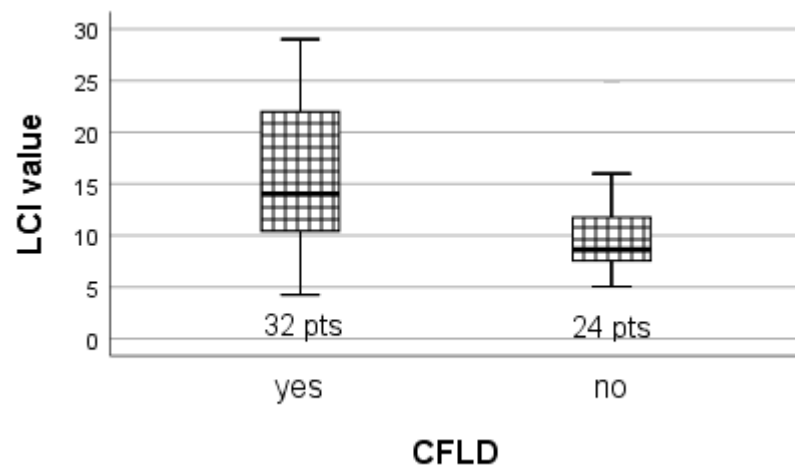

Figure S6. LCI value according to CFLD.

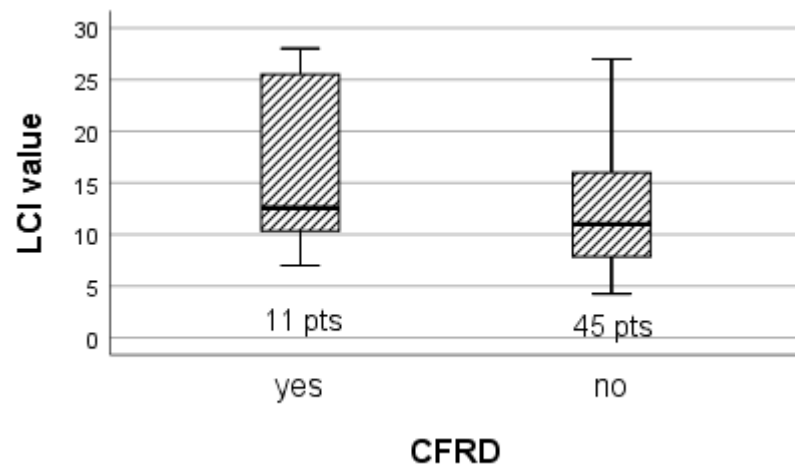

**Figure S7.** LCI value according to CFRD.

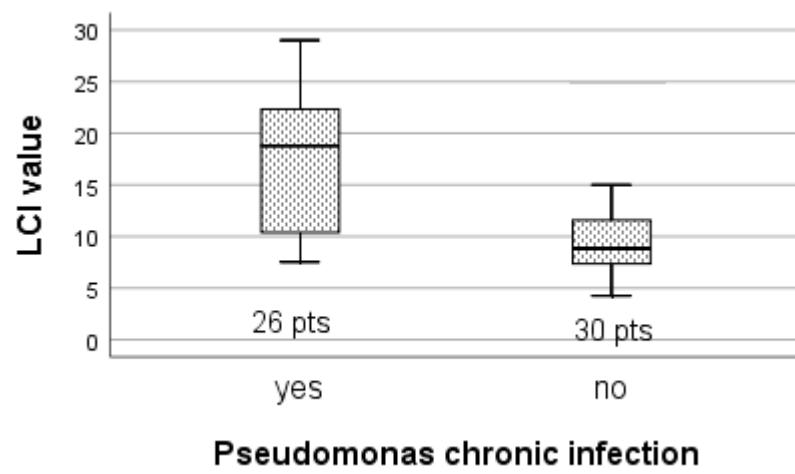

**Figure S8.** LCI value according to Pse chronic infection.
